# Supplementary material for: A method for assessing real time rates of dissolution and absorption of carbohydrate and other food matrices in human subjects
Source: Royal Society of Chemistry journal article supplement (doi:10.1039/c6fo00406g), 2016-01-01
Supplement: c6fo00406g1.pdf [file c6fo00406g1.pdf]

## Appendix

**Table A: Mean percentage recoveries and standard errors of mannitol during the 1 - 2.5 h and 2.5 - 4 h periods following consumption of 50 g uncooked pasta, 50 g hydrated pasta powder and 50 ml lactulose mannitol solution**

| Intervention          | Period      |             |
|-----------------------|-------------|-------------|
|                       | 1 - 2.5 h   | 2.5 - 4 h   |
| Uncooked pasta        | 7.07 ± 0.71 | 6.32 ± 0.45 |
| Hydrated pasta powder | 7.59 ± 0.64 | 4.07 ± 0.31 |
| Solution              | 9.04 ± 0.67 | 4.41 ± 0.36 |
